# Supplementary material for: Reactive oxygen species formed in organic lithium–oxygen batteries
Source: Royal Society of Chemistry journal article supplement (doi:10.1039/c5cp07145c), 2016-01-01
Supplement: c5cp07145c1.pdf [file c5cp07145c1.pdf]

1    **Reactive oxygen species formed in organic lithium-oxygen**  
2                                            **batteries**

3                                            **- Supporting Information -**

4  
5                    Patrick Schwager<sup>a,b</sup>, Saustin Dongmo<sup>b</sup>, Daniela Fenske<sup>a</sup>, Gunther Wittstock<sup>b\*</sup>

6  
7       <sup>a</sup> *Fraunhofer Institute for Manufacturing Technology and Advanced Materials IFAM, Wiener*  
8       *Str. 12, D-28359 Bremen, Germany*

9       <sup>b</sup> *Carl von Ossietzky University, Faculty of Mathematics and Natural Science, Center of*  
10       *Interface Science, Department of Chemistry, D-26111 Oldenburg, Germany*

11       \*Corresponding Author

12       Phone (+49-441) 798 3971

13       Fax (+49-441) 798 3979

14       Email: [gunther.wittstock@uni-oldenburg.de](mailto:gunther.wittstock@uni-oldenburg.de)

15

16       **Table of contents**

17       SI-1 Influence of reduction pulse length

## 18 **SI-1 Influence of reduction pulse length**

19 A Pt-ME with an active radius of  $r_T = 12.5 \mu\text{m}$  was used. Figure SI-1 shows multi-cycle CVs  
20 at the ME after the ME and GDE had been at OCP for 15 min. Prior to that incubation time  
21 and recording of the CV, the GDE performed ORR at  $E_{\text{GDE}} = -0.7 \text{ V}$  for 120 s (Fig. SI-1A),  
22 240 s (Fig. SI-1B) and 360 s (Fig. SI-1-1C). After 120 s a broad peak around  $E_{\text{ME}} = 0.3 \text{ V}$  is  
23 noticeable in the CV recorded at the ME. With increasing duration of the reduction pulse at  
24 the GDE, two peaks develop at  $E_{\text{ME}} = 0.15 \text{ V}$  and  $E_{\text{ME}} = 0.45 \text{ V}$  in the subsequently recorded  
25 CV at the ME. It is very clear that the ME accumulates a soluble compound formed during the  
26 reduction pulse as increasing reduction pulse length leads to more detected products. Because  
27 the ME and the GDE are not in physical contact, this compound must diffuse across the  
28 interelectrode distance of  $(10 \pm 2) \mu\text{m}$ .

29 Surprisingly, the first peak disappears in the following cycles while the second  
30 remains. Fig. SI-1D compares the first positive half cycles of Figs. SI-1A to SI-1C. This  
31 behavior is not fully understood yet and needs further investigation.

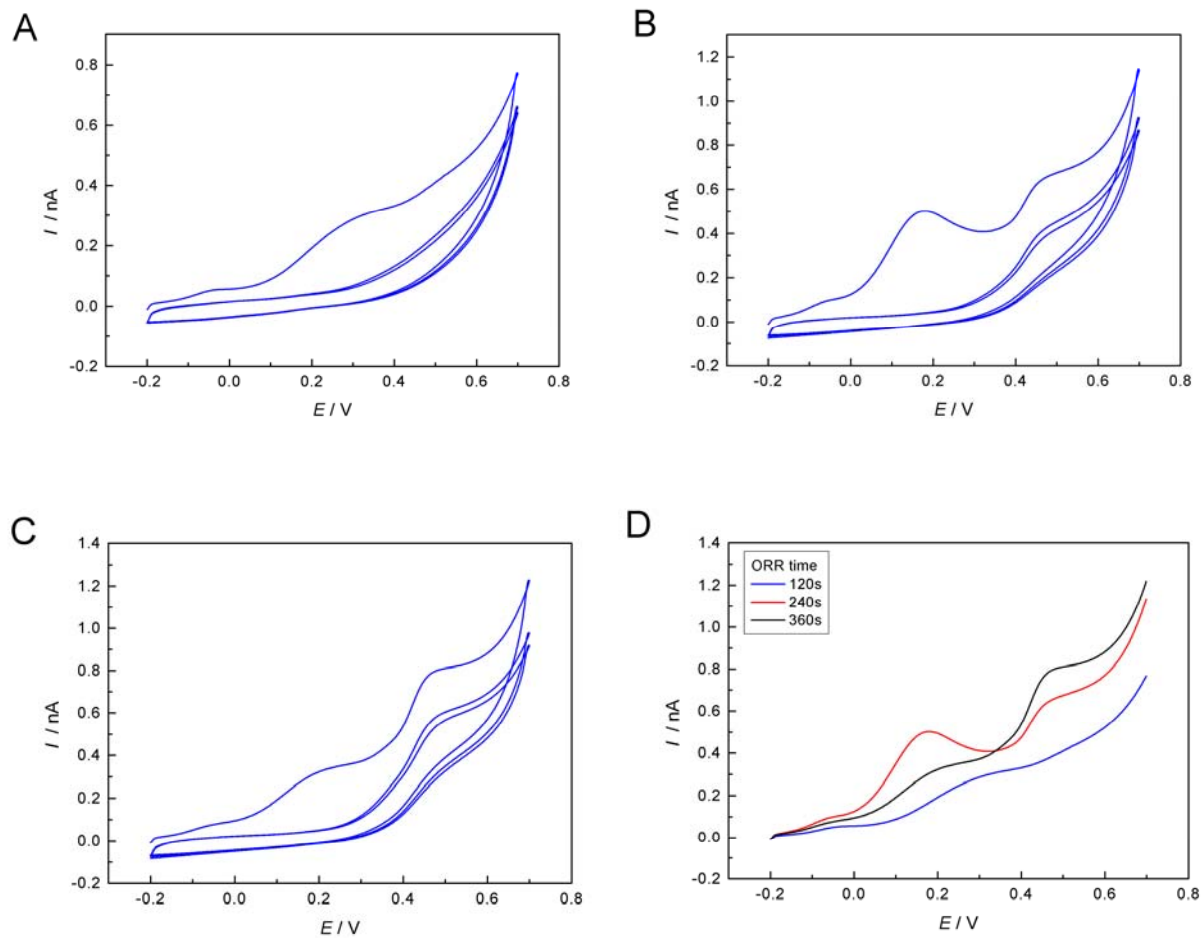

32 Fig. SI-1 CVs recorded at the ME after the GDE and ME were held at OCP for 15 min. Prior to that incubation  
 33 time the GDE performed an ORR at  $E_{\text{GDE}} = -0.7$  V for A) 120 s B) 240 s C) 360 s. D) Comparison of the first  
 34 positive going half cycle of panels A-C.
